# Supplementary material
Source: PubMed Central journal article supplement (PMC3400774)
Supplement: mmc1.pdf [file mmc1.pdf]

# **Chemical composition and sulfur speciation in bulk tissue by X-ray spectroscopy and X-ray microscopy: corneal development during embryogenesis**

## **Supporting Material**

Elena Koudouna<sup>†</sup>, Giulia Veronesi<sup>‡</sup>, Imran I. Patel<sup>§</sup>, Marine Cotte<sup>‡</sup>, Carlo Knupp<sup>†</sup>,

Francis L. Martin<sup>§</sup>, Andrew J. Quantock<sup>†\*</sup>

<sup>†</sup>Structural Biophysics Group, School of Optometry and Vision Sciences, Cardiff University, Maindy Road, Cardiff CF24 4LU, Wales, UK

<sup>‡</sup>X-ray Microscopy Beamline ID21, European Synchrotron Radiation Facility, POB 220 Grenoble Cedex, France

<sup>§</sup>Centre for Biophotonics, Lancaster Environment Centre, Lancaster University, Bailrigg, Lancaster LA1 4YQ, UK

**Table S1 Energies of K-alpha fluorescence emission lines for distinct elements.**

| <b>Element</b> | <b>K-alpha<br/>edge energy (eV)</b> |
|----------------|-------------------------------------|
| Phosphorus (P) | 2015                                |
| Sulfur (S)     | 2308                                |
| Chlorine (Cl)  | 2622                                |
| Potassium (K)  | 3313                                |
| Calcium (Ca)   | 3691                                |

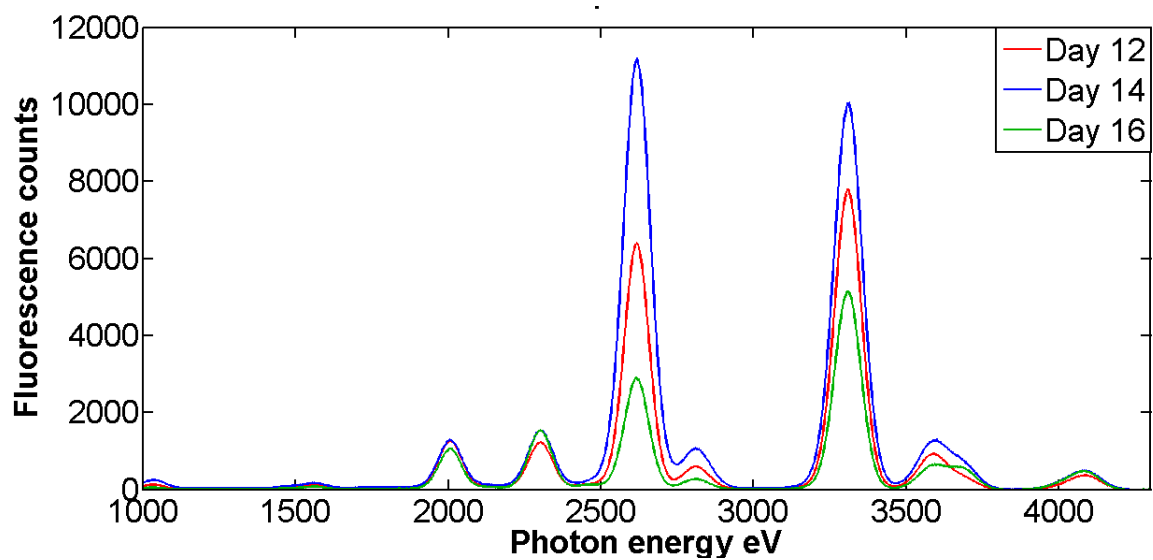

FIGURE S1 Elemental alterations in the developing chick cornea. XRF microscopy average spectra of developing chick corneas at days 12 (red), 14 (blue) and 16 (green). Four corneas per embryonic day were analyzed using the scanning X-ray microscope at the endstation ID21 at the ESRF.

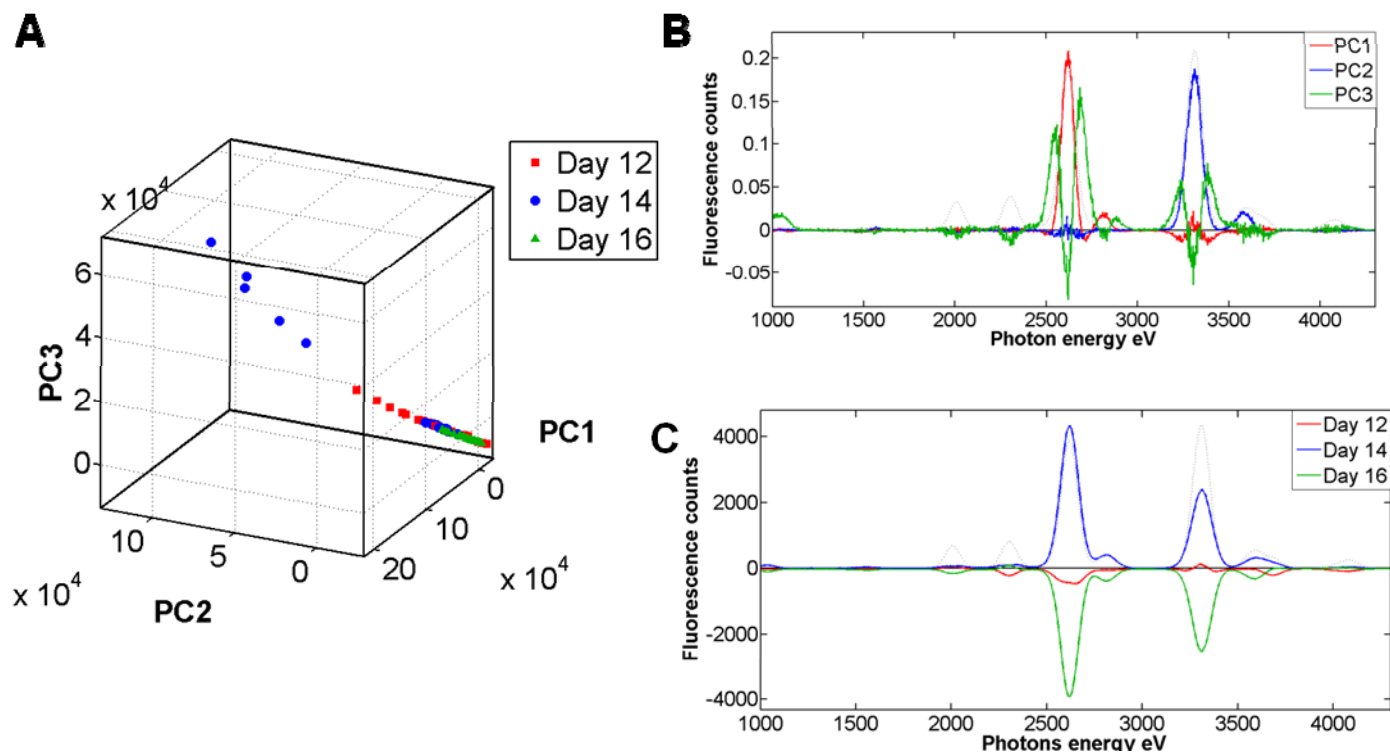

FIGURE S2 Identification of the chemical composition associated with spectral clusters of distinct developing chick corneas using XRF microscopy with PCA. **(A)** 3-D PCA scores plot of chick corneas at different developmental days: day 12 (red squares) vs. day 14 (blue circles) vs. day 16 (green triangles). **(B)** PCA loadings plot of developing chick cornea at day 12 vs. chick cornea at day 14 vs. chick cornea at day 16 with principal components (PCs) as follows: PC1 (red), PC2 (blue), PC3 (green). **(C)** Corresponding PCA cluster vectors plot of developing cornea at day 12 vs. cornea at day 14 vs. cornea at day 16 (cornea at developmental day 12 as comparator).

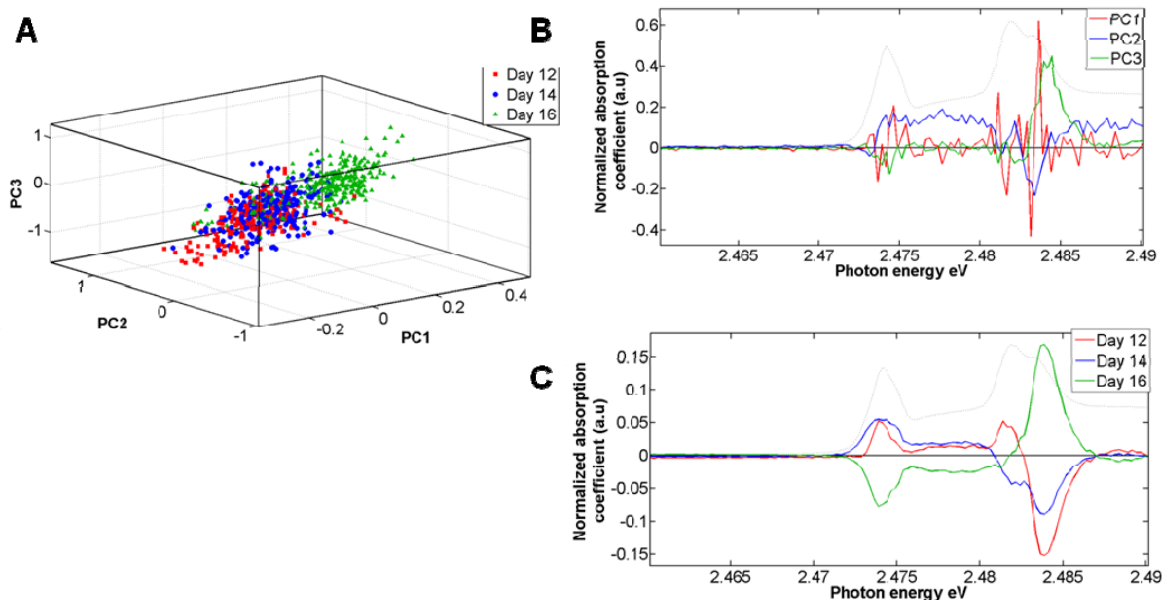

FIGURE S3 S speciation in the developing chick cornea. S XANES spectra of developing chick corneas at days 12, 14 and 16 were obtained and data subjected to PCA. (A) 3-D PCA scatter plot of the S speciation of developing chick corneas at day 12 (red squares) vs. day 14 (blue circles) vs. day 16 (green triangles). (B) Corresponding PCA loading plot of developing chick corneas with principal components (PCs) as follows: PC1 (red), PC2 (blue) and PC3 (green). (C) PCA clusters vector plot of developing chick cornea at day 12 vs. day 14 vs. day 16 (chick cornea at day 12 as comparator).
